# Supplementary material for: Anion polarity-induced dual oxidation states in a dual-layered purely organic paramagnetic charge-transfer salt, (TTF)3(PO-CON(CH3)C2H4SO3)2, where PO = 2,2,5,5-tetramethyl-3-pyrrolin-1-oxyl free radical
Source: Royal Society of Chemistry journal article supplement (doi:10.1039/c1ce05578j), 2011-01-01
Supplement: c1ce05578j.pdf [file c1ce05578j.pdf]

## Supporting Information

**Anion polarity-induced dual oxidation states in a dual-layered purely organic paramagnetic charge-transfer salt, (TTF)<sub>3</sub>(PO-CON(CH<sub>3</sub>)C<sub>2</sub>H<sub>4</sub>SO<sub>3</sub>)<sub>2</sub>, where PO =**

**2,2,5,5-tetramethyl-3-pyrrolin-1-oxyl Free Radical**

Hiroki Akutsu,<sup>\*a</sup> Atsushi Kawamura,<sup>a</sup> Jun-ichi Yamada,<sup>a</sup> Shin'ichi Nakatsuji,<sup>a</sup> and Scott S. Turner<sup>b</sup>

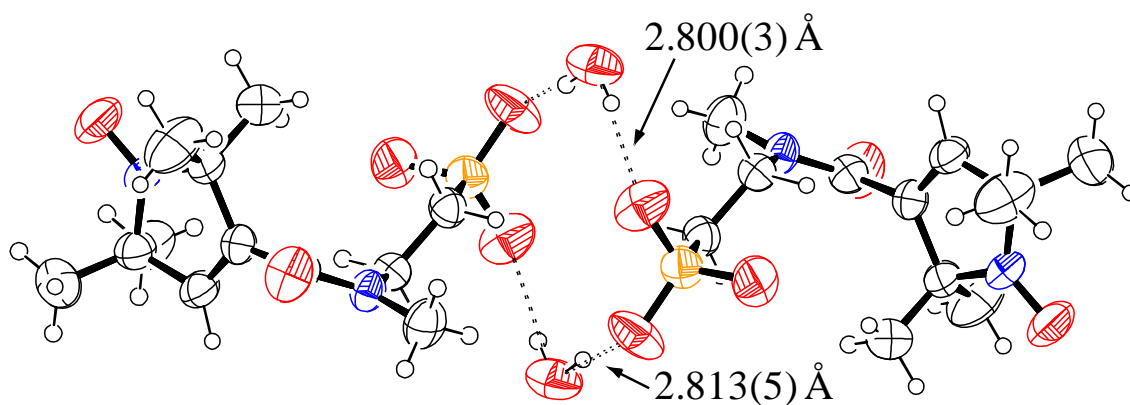

Figure S1. Structure of a hydrogen-bonded dimer of the anion **1** and water in **2**. Dashed lines indicate the short O...O contacts.
